# Supplementary material for: Excimer probe of the binding of alkyl disulfides to gold nanoparticles and subsequent monolayer dynamics
Source: Royal Society of Chemistry journal article supplement (doi:10.1039/b310952f), 2004-01-01

Supplementary information for M.H.V. Werts et al., "Excimer probe of the binding of alkyl disulfides to gold nanoparticles and subsequent monolayer dynamics"

Absorption spectra of nanoparticle solutions in toluene

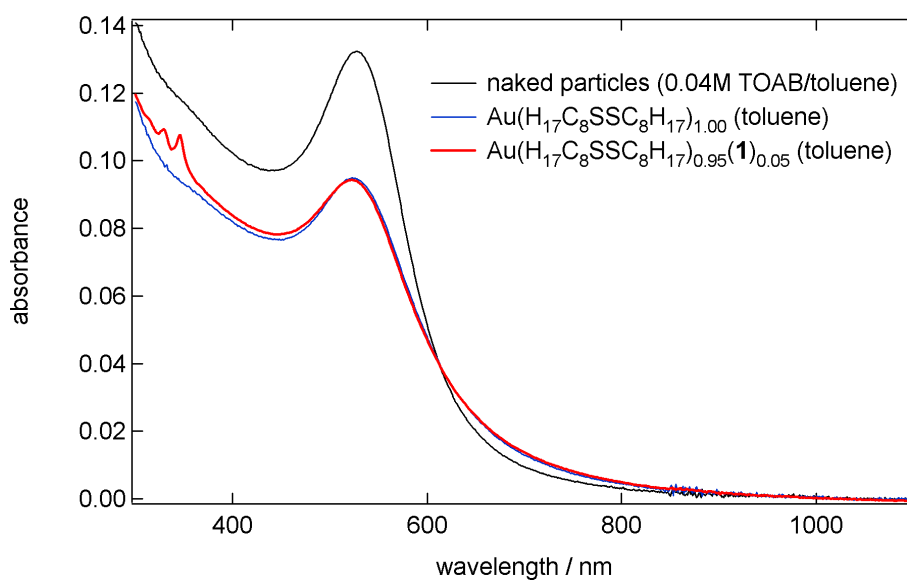

Supplement: b310952f.pdf [file b310952f.pdf]
